# Supplementary material for: Antiviral activity of silymarin and baicalein against dengue virus
Source: PubMed Central journal article supplement (PMC8551334; doi:10.1038/s41598-021-98949-y), 2021-10-27
Supplement: 41598_2021_98949_MOESM1_ESM.pdf [file 41598_2021_98949_MOESM1_ESM.pdf]

**Supplementary Table 1. Hydrogen bonding of silymarin with DENV E protein (1uzg).** This table shows the H-bond interaction of silymarin with different E protein residues at different affinities ranked by AutoDock Vina 1.5.6. The third column shows the length of each H-bond between the molecule and residue. The last column shows the affinity energy, which was ranked by AutoDock Vina 1.5.6.

| Complex  | Interaction                  | Distance (Å) | Affinity (Kcal/mol) |
|----------|------------------------------|--------------|---------------------|
| conf.1+E | B:GLN120:HE21 - :COMPOUND:O6 | 2.19556      | -8.5                |
|          | B:GLN120:HE21 - :COMPOUND:O7 | 2.07167      | -8.5                |
|          | B:TRP229:HE1 - :COMPOUND:O3  | 2.43571      | -8.5                |
|          | :COMPOUND:H53 - B:ASN89:OD1  | 2.21109      | -8.5                |
|          | :COMPOUND:H54 - B:THR223:OG1 | 2.20495      | -8.5                |
| conf.2+E | A:GLN120:HE21 - :COMPOUND:O6 | 1.96793      | -8.1                |
|          | A:GLN120:HE21 - :COMPOUND:O7 | 1.91219      | -8.1                |
|          | A:LYS225:HZ2 - :COMPOUND:O4  | 1.74175      | -8.1                |
|          | A:TRP229:HE1 - :COMPOUND:O3  | 2.36725      | -8.1                |
|          | :COMPOUND:H51 - A:SER124:OG  | 1.65787      | -8.1                |
| conf.3+E | B:GLN120:HE21 - :COMPOUND:O6 | 2.36058      | -8.1                |
|          | B:GLN120:HE21 - :COMPOUND:O7 | 1.86173      | -8.1                |
|          | :COMPOUND:H53 - B:ASN89:OD1  | 2.41898      | -8.1                |
| conf.4+E | A:GLN120:HE21 - :COMPOUND:O6 | 1.89507      | -7.9                |
|          | A:GLN120:HE21 - :COMPOUND:O7 | 2.23612      | -7.9                |
|          | A:SER124:HG - :COMPOUND:O2   | 2.44181      | -7.9                |
|          | A:LYS225:HZ2 - :COMPOUND:O4  | 1.73866      | -7.9                |
|          | :COMPOUND:H53 - A:PRO227:O   | 2.18388      | -7.9                |
| conf.5+E | :COMPOUND:H52 - A:GLU154:OE1 | 1.88805      | -7.8                |
|          | :COMPOUND:H53 - B:ALA243:O   | 2.17225      | -7.8                |
|          | :COMPOUND:H54 - B:GLN246:O   | 2.11572      | -7.8                |
| conf.7+E | A:LYS110:HZ3 - :COMPOUND:O10 | 1.98159      | -7.5                |
|          | B:ASN8:HN - :COMPOUND:O8     | 1.88598      | -7.5                |
| conf.8+E | B:SER124:HG - :COMPOUND:O2   | 2.37509      | -7.5                |
|          | B:LYS225:HN - :COMPOUND:O8   | 1.91505      | -7.5                |
|          | B:LYS225:HN - :COMPOUND:O10  | 2.4792       | -7.5                |
|          | :COMPOUND:H51 - B:CYS121:O   | 2.24968      | -7.5                |
| conf.9+E | A:THR263:HG1 - :COMPOUND:O10 | 2.24769      | -7.4                |
|          | :COMPOUND:H53 - A:ILE276:O   | 2.40464      | -7.4                |

**Supplementary Table 2. Pi interaction between silymarin and DENV E proteins.** This table shows the pi-cation interactions of silymarin with DENV E protein (1uzg). The distance of interaction is shown in the third column.

| Proteins  | Binding Interaction     | Distance (Å) |
|-----------|-------------------------|--------------|
| E protein | :COMPOUND - A:LYS225:NZ | 5.25161      |
|           | :COMPOUND - B:ARG99:NE  | 5.79745      |
|           | :COMPOUND - B:LYS244:NZ | 3.59212      |
|           | :COMPOUND - B:LYS58:NZ  | 4.28452      |
|           | :COMPOUND - B:LYS225:NZ | 6.8811       |
|           | :COMPOUND - A:LYS225:NZ | 5.44641      |
|           | :COMPOUND - B:LYS225:NZ | 5.82817      |

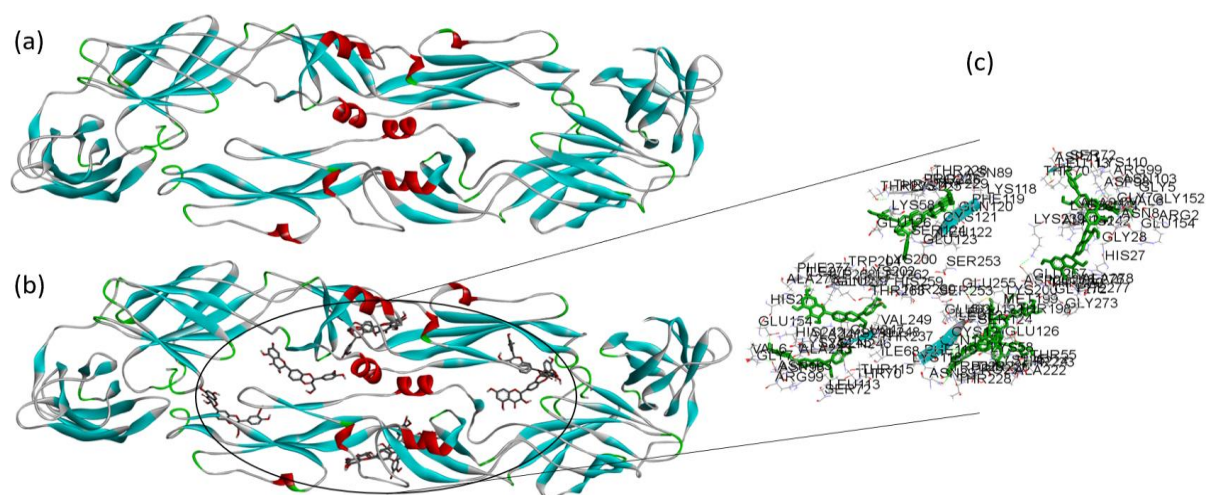

**Supplementary Figure 1. DENV E protein (1uzg) vs. silymarin.** Figure 8(a) DENV E (1uzg) protein structure. Figure 8(b) DENV E (1uzg) protein with silymarin with nine different possible binding sites. Figure 8(c) Close contact and interaction residues between DENV E (1uzg) protein with silymarin with nine different possible binding sites.

|                       | Cell protection assay                                                             |                                                                                   | Direct virucidal assay                                                            |                                                                                    | Indirect virucidal assay                                                            |                                                                                     |
|-----------------------|-----------------------------------------------------------------------------------|-----------------------------------------------------------------------------------|-----------------------------------------------------------------------------------|------------------------------------------------------------------------------------|-------------------------------------------------------------------------------------|-------------------------------------------------------------------------------------|
|                       | Virus control                                                                     | Treatment                                                                         | Virus control                                                                     | Treatment                                                                          | Virus control                                                                       | Treatment                                                                           |
| Silymarin (200 µg/mL) |  |  |  |  |  |  |
| Baicalein (100 µg/mL) |  |  |  |  |  |  |
| Baicalin (20 µg/mL)   |  |  |  |  |  |  |

**Supplementary Figure 2. Antiviral Activity of Silymarin, Baicalein, and Baicalin against DENV-3.** The foci reduction by silymarin (200 µg/mL), baicalein (100 µg/mL), and baicalin (20 µg/mL) at different time point: cell protection or pre-infection stage, direct virucidal and indirect virucidal stage.
